# Supplementary material for: Precise age for the Permian-Triassic boundary in South China from high precision U-Pb geochronology and Bayesian age-depth modelling
Source: Copernicus journal article supplement (doi:10.5194/se-2016-145), 2016-10-28
Supplement: Supplementary file [file se-2016-145-AC2-supplement.pdf]

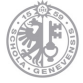

**UNIVERSITÉ  
DE GENÈVE**

**Science de la Terre et  
de l'Environnement**

Université de Genève  
Science de la Terre et  
de l'Environnement  
13, Rue des Maraîchers  
CH-1205 Genève  
Phone +41 22 379 66 28  
Fax +41 22 379 32 10  
<http://cms.unige.ch/sciences/terre/>

**Editorial Board  
Solid Earth**

**Björn Baresel**  
Phone +41 22 379 66 25  
[bjorn@heldenepos.de](mailto:bjorn@heldenepos.de)

**Submission of a manuscript entitled**

*Precise age for the Permian-Triassic boundary in South China from high precision U-Pb geochronology and Bayesian age-depth modeling*

By

Björn Baresel, Hugo Bucher, Morgane Brosse, Fabrice Cordey, Kuang Guodun, Urs Schaltegger

**To Solid Earth**

Dear Dr. Heap,

We addressed all critical points raised by the reviewers following their constructive criticism and suggestions in a point-by-point reply in the discussion forum.

We confirm that this work is original and has not been published elsewhere, nor is it currently under consideration for publication elsewhere. Thank you for your consideration of this manuscript.

Yours sincerely,

Björn Baresel and co-authors
